# Supplementary material for: Social media impact in the Match: A survey of current trends in the United States
Source: PubMed Central journal article supplement — Arch Plast Surg. 2021 Jan 15;48(1):107–13. doi: 10.5999/aps.2020.00836 (PMC7861983; doi:10.5999/aps.2020.00836), 2021-01-15
Supplement: aps-2020-00836-suppl1.pdf [file aps-2020-00836-suppl1.pdf]

**Supplemental Material 1. Applicant survey questions**

## 1. Age

- 18-22
- 23-27
- 28-32
- 33-37
- 38-42
- 42+

## 2. Do you have a social media account?

- Yes
- No

## 3. Please select all platforms on which you have an account:

- Facebook
- Instagram
- Twitter
- Snapchat
- LinkedIn
- Other

## 4. How much time (on average) do you spend on social media throughout a 24-hour period?

- 0-30 minutes
- 30-60 minutes
- 1-2 hours
- 2-3 hours
- 3-4 hours
- > 4 hours

## 5. Do you follow any Plastic &amp; Reconstructive Residency social media accounts? Yes/No

## 6. If "Yes" on Question 5, what platforms do you follow the accounts on?

- Facebook
- Instagram
- Twitter

## 7. When selecting which residency programs to apply for away rotations/visiting rotations/sub-internships, what sources of information did you access?

- Program Website
- Online Forum/Discussion Board
- Program's Social Media Account
- Direct Contact with Program Coordinator
- Mentor/Faculty at Home Institution
- Other Residents
- Other Applicants
- Other

8. When selecting residency programs to apply via ERAS, what sources of information did you access?
- Program Website
  - Online Forum/Discussion Board
  - Program's Social Media Account
  - Direct Contact with Program Coordinator
  - Mentor/Faculty at Home Institution
  - Other Residents
  - Other Applicants
  - Other
9. If all sources listed below were available to you, how likely would you be to access each source in order to gather information about a given residency program? (Very Likely, Somewhat Likely, Not Likely, I would not access this source of information)
- Program Website
  - Online Forum/Discussion Board
  - Program's Social Media Account
  - Direct Contact with Program Coordinator
  - Mentor/Faculty at Home Institution
  - Other Residents
  - Other Applicants
10. What type of information would you like to see on a residency program's social media account?
- Educational content
  - Resident Life
  - Promotional Marketing
  - Other
